# Supplementary material for: Proton-gated anion transport governs macropinosome shrinkage
Source: PubMed Central journal article supplement (PMC9203271; doi:10.1038/s41556-022-00912-0), 2022-05-19
Supplement: 41556_2022_912_MOESM8_ESM.pdf [file 41556_2022_912_MOESM8_ESM.pdf]

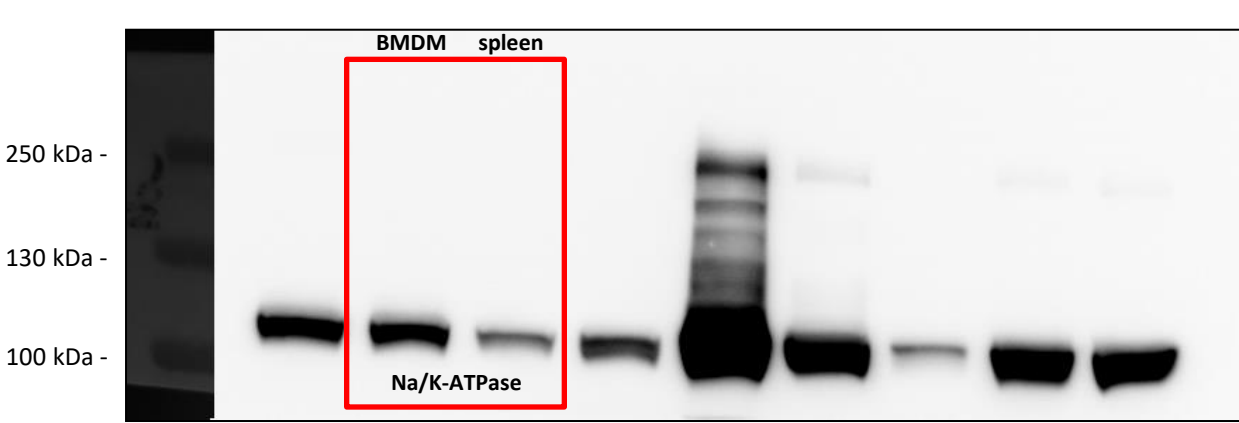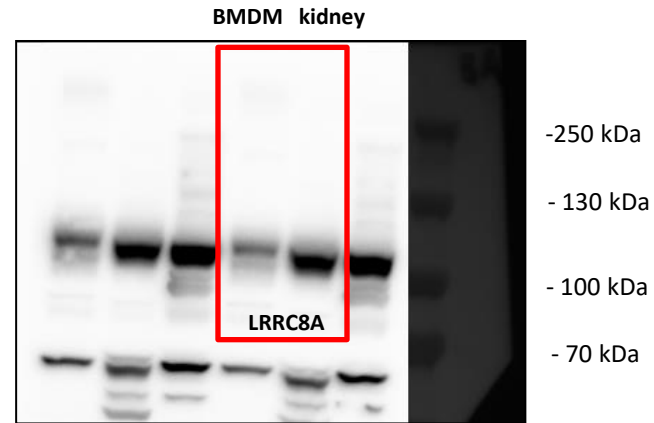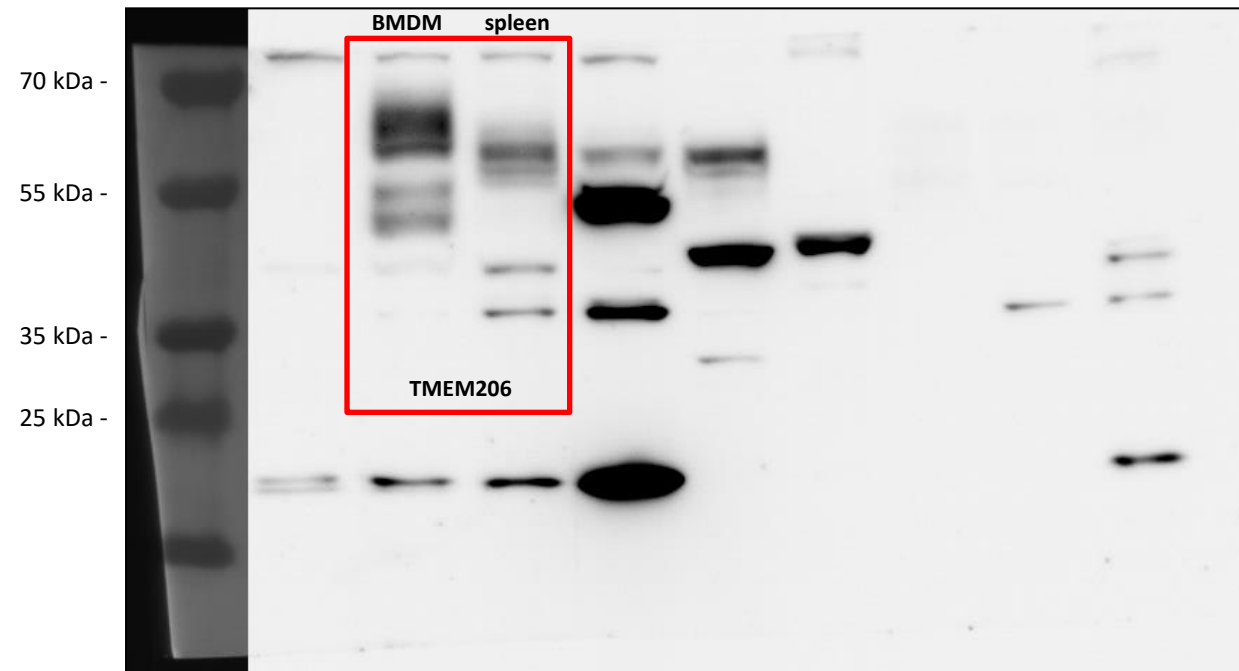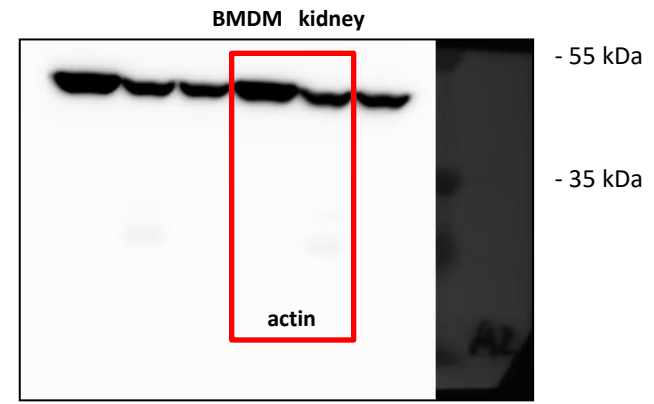

Figure 1g

Figure 1f

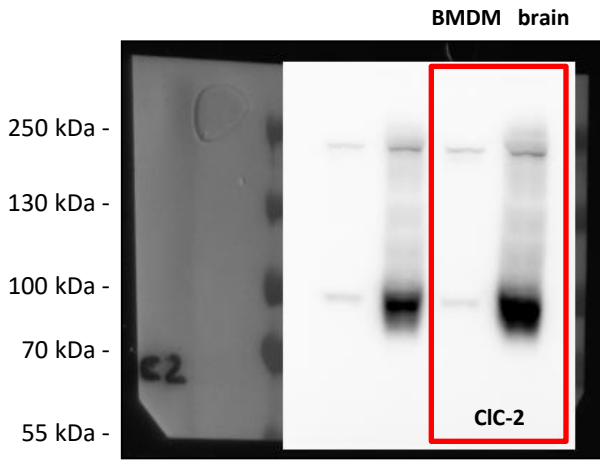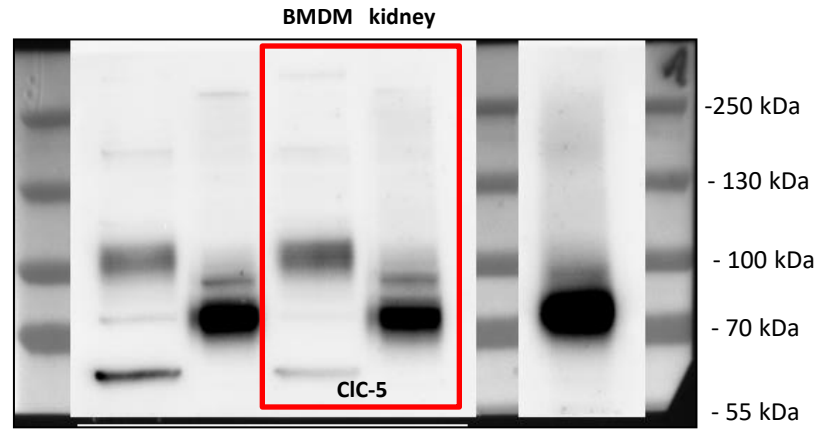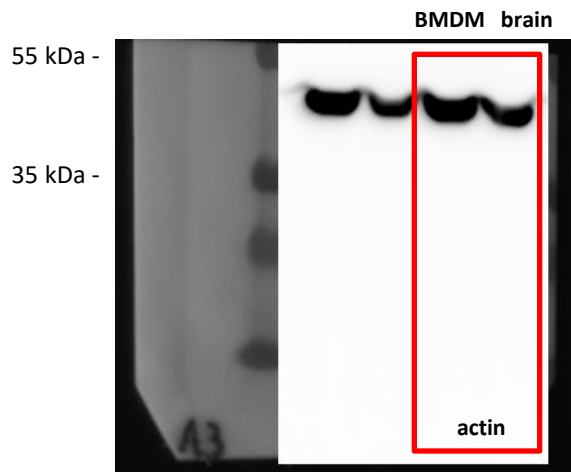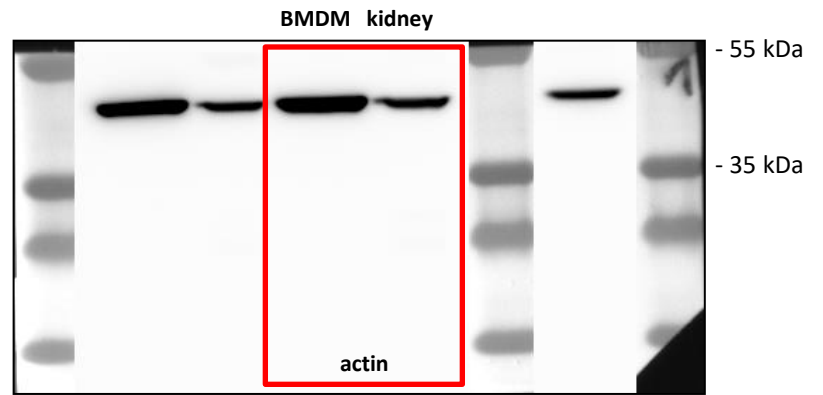

**Figure 1h**

**Figure 1k**

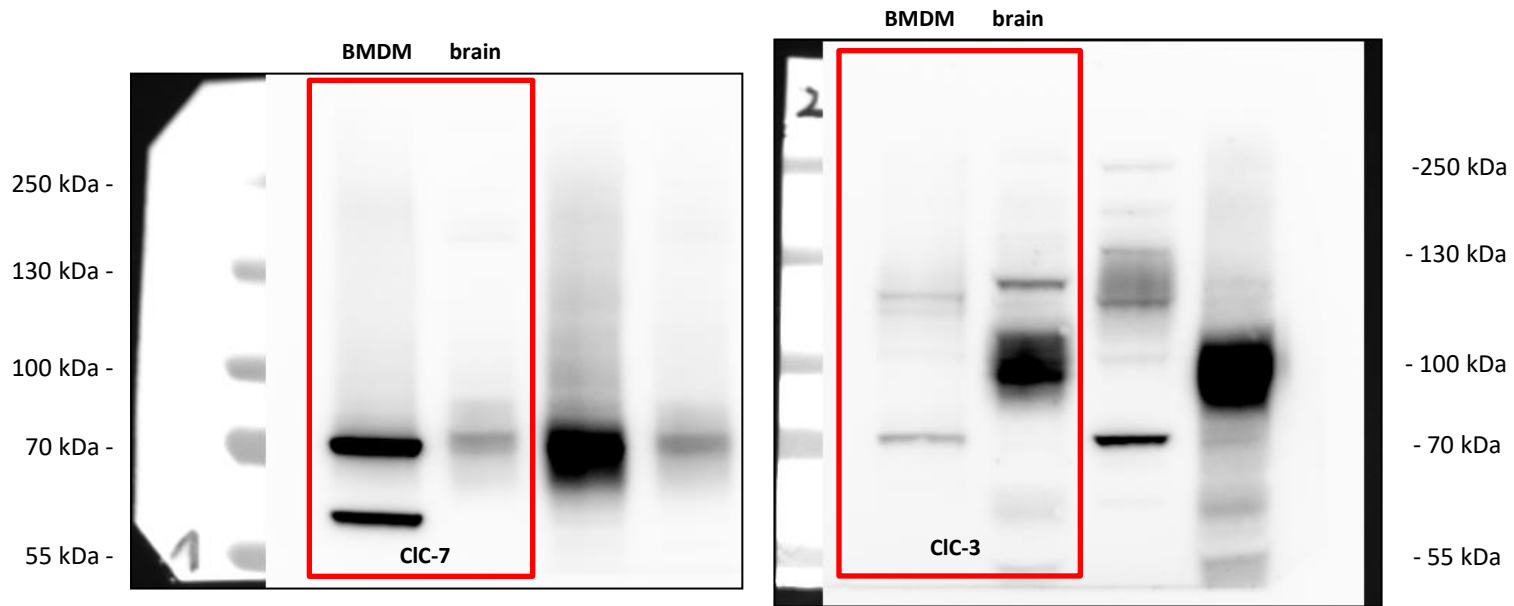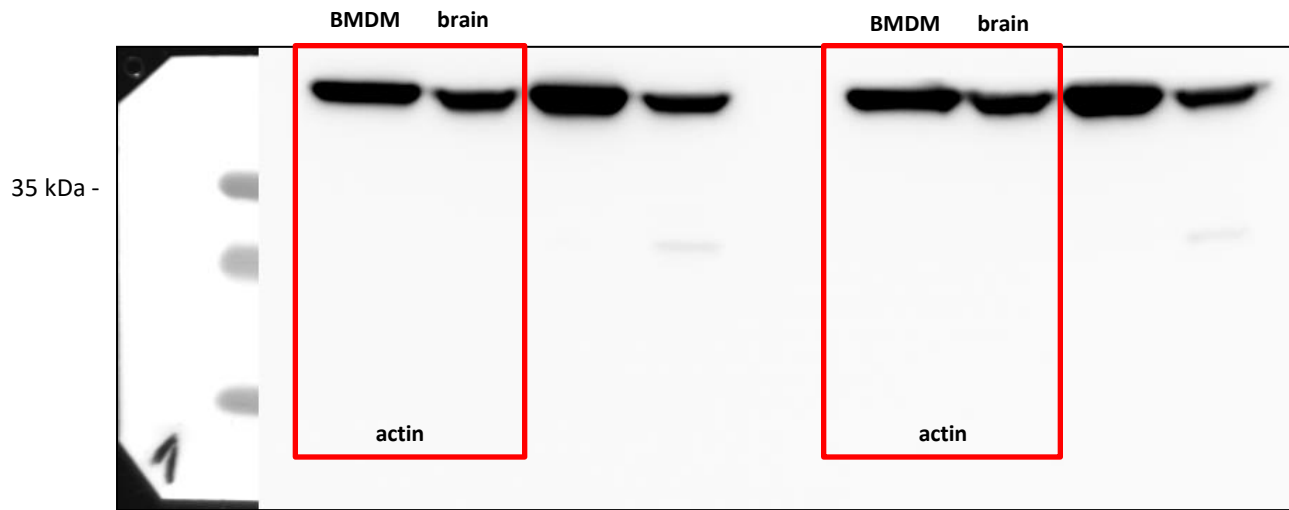

Figure 1m

Figure 1i

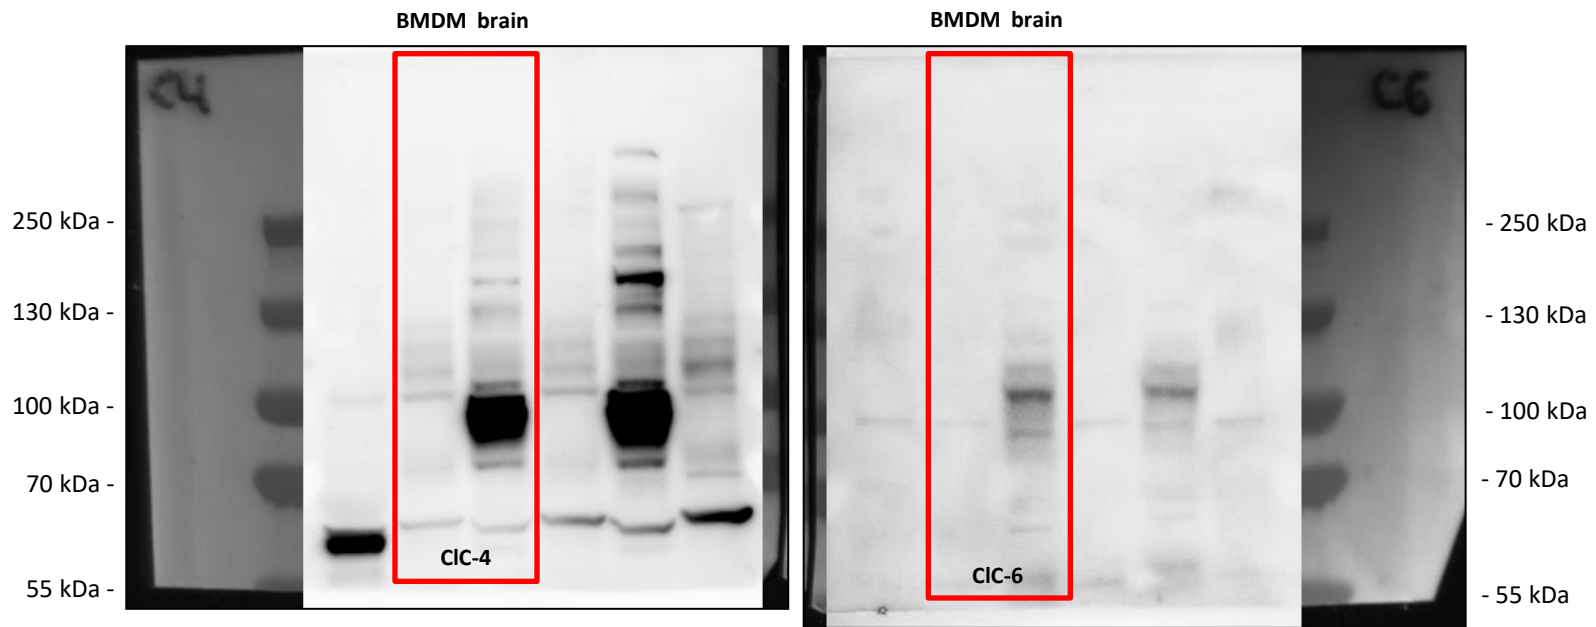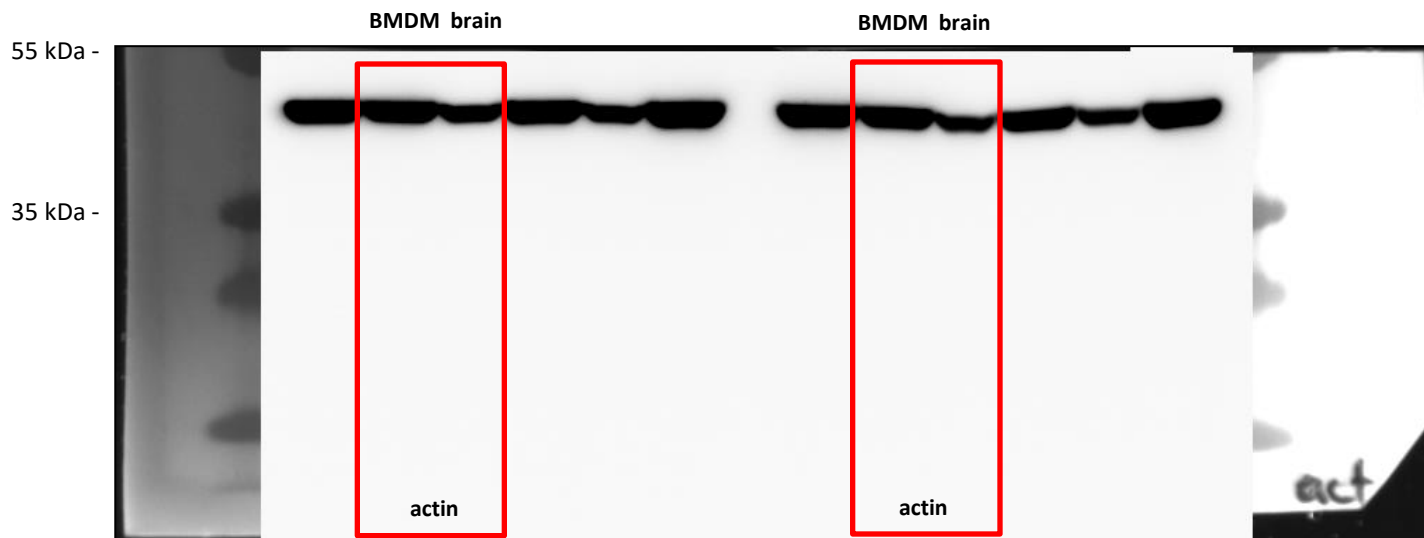

**Figure 1j**

**Figure 1l**
