# Supplementary material for: Proton-gated anion transport governs macropinosome shrinkage
Source: PubMed Central journal article supplement (PMC9203271; doi:10.1038/s41556-022-00912-0), 2022-05-19
Supplement: 41556_2022_912_MOESM15_ESM.pdf [file 41556_2022_912_MOESM15_ESM.pdf]

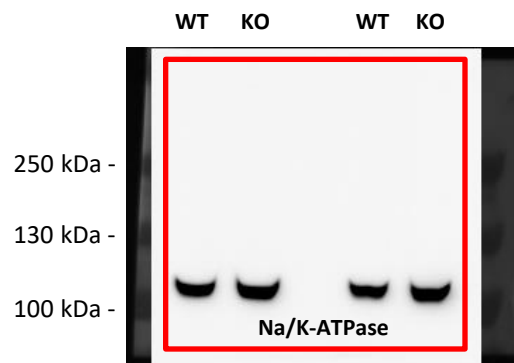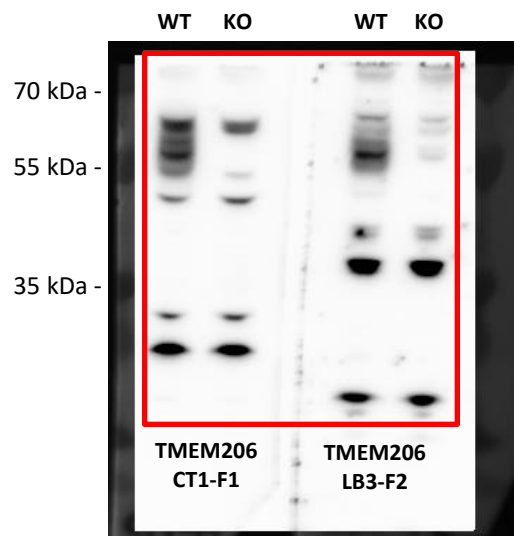

**Extended Data Figure 1a+b**
